# Supplementary material for: Multipeptide immune response to cancer vaccine IMA901 after single-dose cyclophosphamide associates with longer patient survival
Source: Springer Nature journal article supplement (doi:10.1038/nm.2883), 2012-07-29
Supplement: 41591_2012_BFnm2883_MOESM27_ESM.pdf [file 41591_2012_BFnm2883_MOESM27_ESM.pdf]

## **Multipeptide immune response to cancer vaccine IMA901 after single-dose cyclophosphamide associates with longer patient survival**

Steffen Walter<sup>1,21</sup>, Toni Weinschenk<sup>1,21</sup>, Arnulf Stenzl<sup>2</sup>, Romuald Zdrojowy<sup>3</sup>, Anna Pluzanska<sup>4</sup>, Cezary Szczylik<sup>5</sup>, Michael Staehler<sup>6</sup>, Wolfram Brugger<sup>7</sup>, Pierre-Yves Dietrich<sup>8</sup>, Regina Mendrzyk<sup>1</sup>, Norbert Hilf<sup>1</sup>, Oliver Schoor<sup>1</sup>, Jens Fritsche<sup>1</sup>, Andrea Mahr<sup>1</sup>, Dominik Maurer<sup>1</sup>, Verona Vass<sup>1</sup>, Claudia Trautwein<sup>1</sup>, Peter Lewandrowski<sup>1</sup>, Christian Flohr<sup>1</sup>, Heike Pohla<sup>9,10</sup>, Janusz J Stanczak<sup>11</sup>, Vincenzo Bronte<sup>12</sup>, Susanna Mandruzzato<sup>13,14</sup>, Tilo Biedermann<sup>15</sup>, Graham Pawelec<sup>16</sup>, Evelyn Derhovanessian<sup>16</sup>, Hisakazu Yamagishi<sup>17</sup>, Tsuneharu Miki<sup>18</sup>, Fumiya Hongo<sup>18</sup>, Natsuki Takaha<sup>18</sup>, Kosei Hirakawa<sup>19</sup>, Hiroaki Tanaka<sup>19</sup>, Stefan Stevanovic<sup>20</sup>, Jürgen Frisch<sup>1</sup>, Andrea Mayer-Mokler<sup>1</sup>, Alexandra Kirner<sup>1</sup>, Hans-Georg Rammensee<sup>20</sup>, Carsten Reinhardt<sup>1,21</sup> & Harpreet Singh-Jasuja<sup>1,21</sup>

<sup>1</sup> Immatics Biotechnologies GmbH, Tübingen, Germany.

<sup>2</sup> Department of Urology, Eberhard Karls University Tübingen, Tübingen, Germany.

<sup>3</sup> Department of Urology and Urological Oncology, University of Medicine, Wrocław, Poland.

<sup>4</sup> Klinika Chemioterapii Nowotworow UM, Uniwersytetu Medycznego, Lodz, Poland.

<sup>5</sup> Department of Oncology, Military Institute of Medicine, Warsaw, Poland.

<sup>6</sup> Interdisziplinäres Zentrum für Nierentumore (IZN), Ludwig Maximilians University, Munich, Germany.

<sup>7</sup> Department of Hematology, Oncology & Immunology, Schwarzwald-Baar Klinikum and Academic Teaching Hospital of the University of Freiburg, Villingen-Schwenningen, Germany.

<sup>8</sup> Laboratory of Tumour Immunology, Centre of Oncology, University Hospital of Geneva, Geneva, Switzerland.

<sup>9</sup> Laboratory of Tumor Immunology, LIFE Center, Ludwig Maximilians University, Munich, Germany.

<sup>10</sup> Institute of Molecular Immunology, Helmholtz Center Munich, Munich, Germany.

<sup>11</sup> Molecular Diagnostics Laboratory, Hospital for Infectious Diseases, Warsaw, Poland.

<sup>12</sup> Department of Pathology and Diagnostic, Verona University Hospital, Verona, Italy.

<sup>13</sup> Department of Surgery, Oncology and Gastroenterology, University of Padova, Padova, Italy.

<sup>14</sup> Istituto Oncologico Veneto (IOV) Istituto Di Ricovero e Cura a Carattere Scientifico (IRCCS), Padova, Italy.

<sup>15</sup> Department of Dermatology, Eberhard Karls University Tübingen, Tübingen, Germany.

<sup>16</sup> Department of Internal Medicine II, Centre for Medical Research, Eberhard Karls University Tübingen, Tübingen, Germany.

<sup>17</sup> Department of Surgery, Kyoto Prefectural University of Medicine, Kyoto, Japan.

<sup>18</sup> Department of Urology, Kyoto Prefectural University of Medicine, Kyoto, Japan.

<sup>19</sup> Department of Surgical Oncology, Osaka City University, Osaka, Japan.

<sup>20</sup> Department of Immunology, Eberhard Karls University Tübingen, Tübingen, Germany.

<sup>21</sup> These authors contributed equally to this work. Correspondence should be addressed to H.S.-J. (singh@immatics.com).

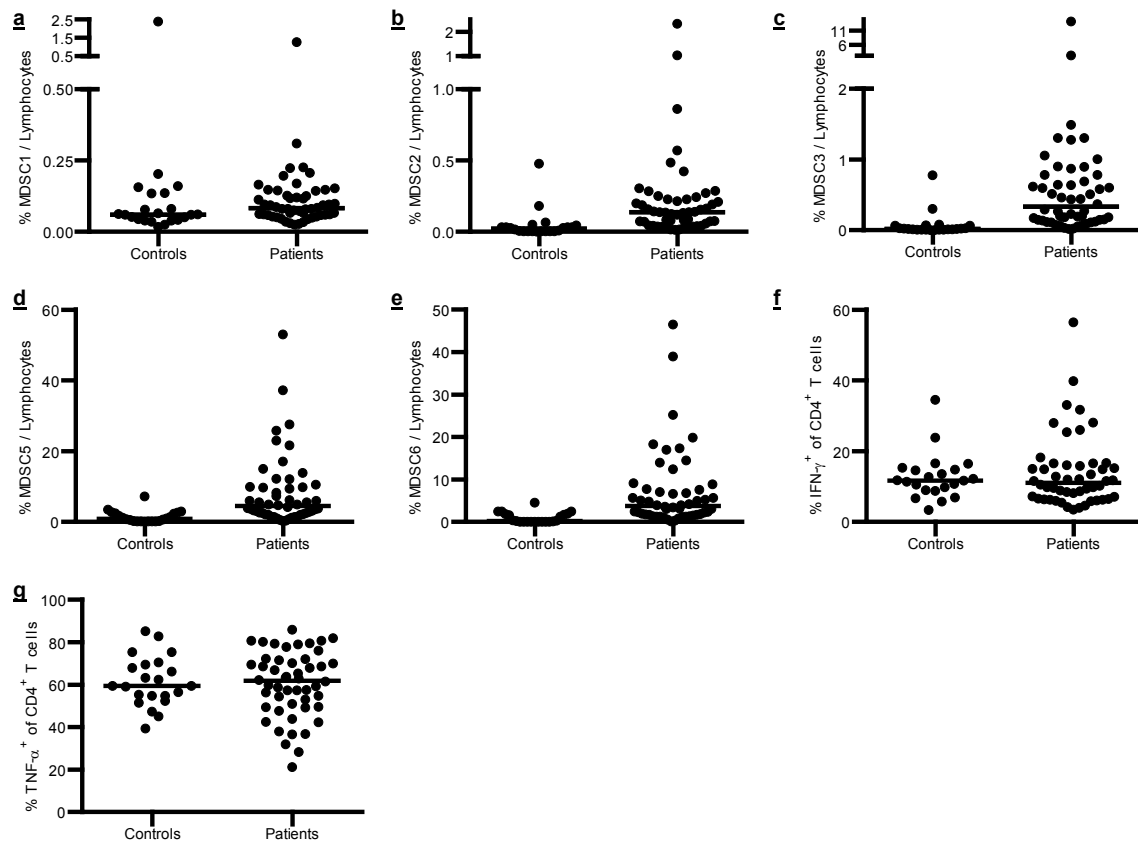

**Supplementary Figure 1: Analysis of pre-treatment biomarkers.**

Comparison of pre-treatment cellular biomarkers of evaluable ITT patients aged < 70 years (N=50-52) and age/gender-matched healthy controls (N=22). (●) represent individuals and (—) represent medians. (a) MDSC1 p=0.091, (b) MDSC2 p<0.0001, (c) MDSC3 p<0.0001, (d) MDSC5 p<0.0001, (e) MDSC6 p<0.0001, (f) IFN- $\gamma$ <sup>+</sup> p=0.73 and (g) TNF- $\alpha$ <sup>+</sup> T<sub>H</sub> subset p=0.99.

Walter et al., Supplementary Figure 2

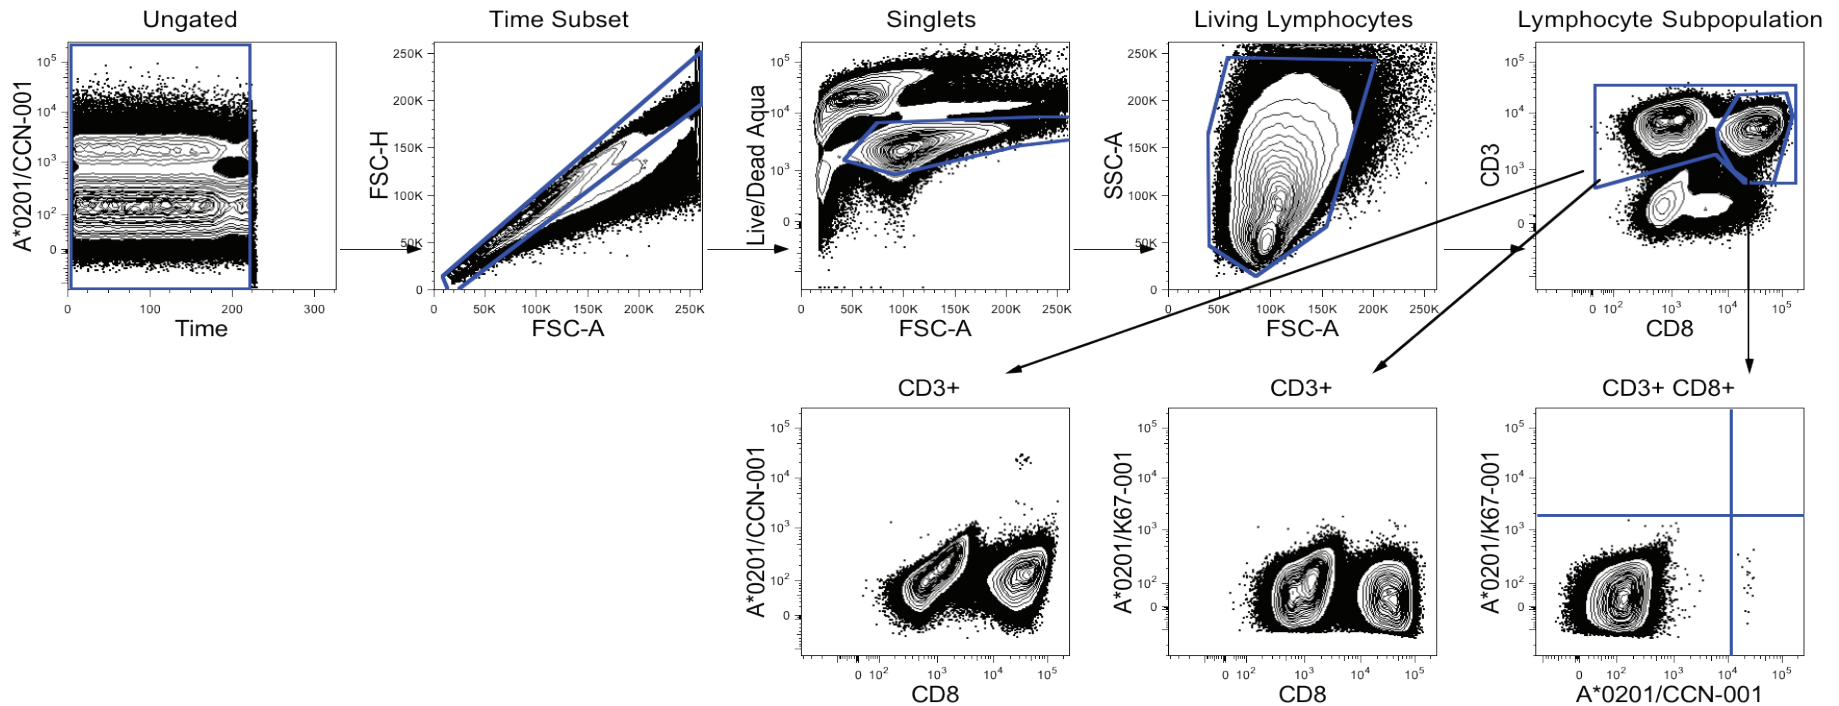

**Supplementary Figure 2: Flow cytometry analysis of one representative vaccine-induced response of the IMA901 phase II study with detailed gating strategy.**

Staining was performed using a live/dead marker, CD3- and CD8-antibodies and two different PE- and APC-labeled multimeric HLA/peptide complexes. Due to the high variability of the HLA multimer staining to individual patient T-cell populations, a uniform gating for the entire study was not feasible, however all gates were kept identical for each patient and antigen. First, singlets were identified by setting a time gate followed by exclusion of doublets using an FSC-A vs. FSC-H plot. Within the singlets living lymphocytes were identified by gating dead cell marker negative cells and subsequently a lymphocyte subpopulation was defined by gating FSC-A vs. SSC-A. Next, gates were set around CD3<sup>+</sup> and CD3<sup>+</sup>CD8<sup>+</sup> cells respectively. Stainings for PE-labeled or APC-labeled multimers were then visualized first within the CD3<sup>+</sup> subset by plotting each multimer staining vs. CD8 and finally in a multimer vs. multimer plot showing CD3<sup>+</sup>CD8<sup>+</sup> cells to identify single multimer binding T cells.

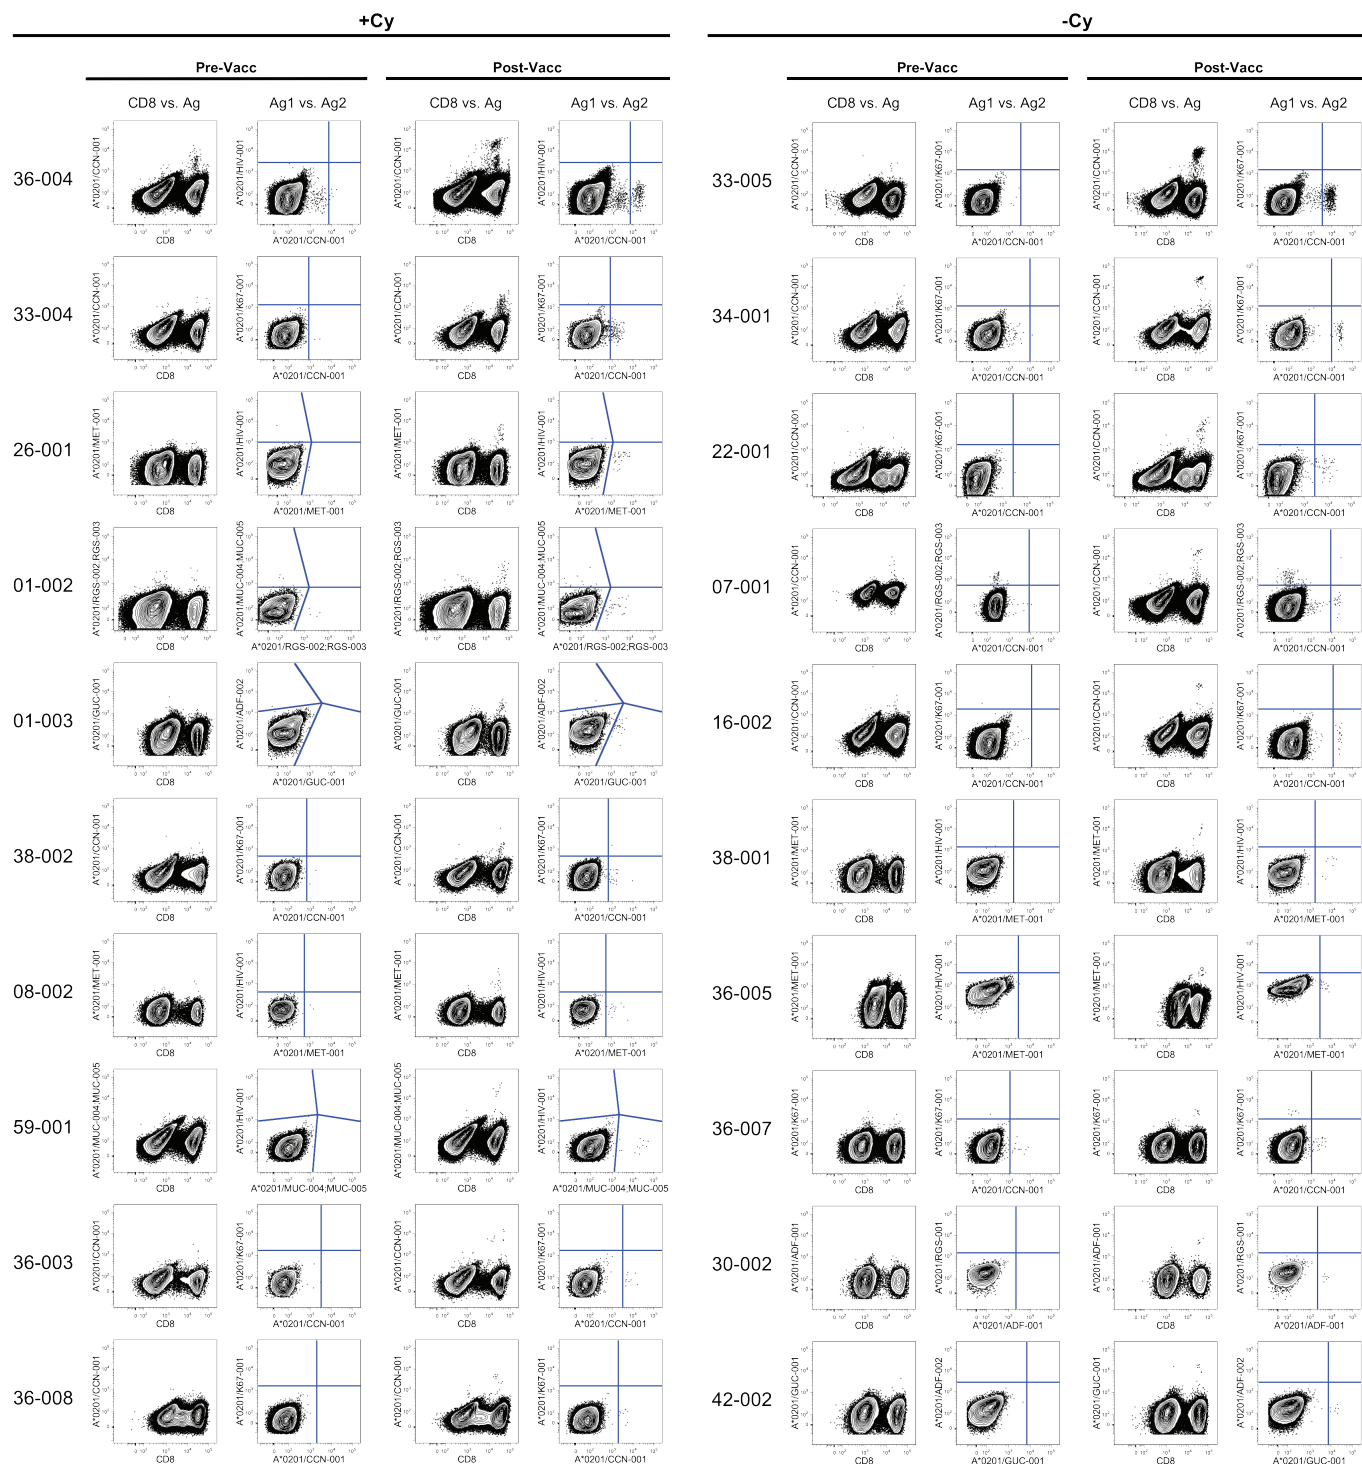

**Supplementary Figure 3**

**Flow cytometry plots of 20 vaccine-induced responses of the IMA901 phase II study.** Staining and gating analysis was performed as detailed in legend to Supplementary Figure 2. For each patient two plots of the pre-vaccination time-point and a post-vaccination time-point are shown: (1.) CD8 vs. multimer-1 showing CD3<sup>+</sup> cells and (2.) multimer-1 vs. multimer-2 showing CD3<sup>+</sup>CD8<sup>+</sup> cells, the latter allowing demonstration of peptide specific multimer binding. A response was determined as vaccine-induced if the frequency of multimer-positive cells in the respective post-vaccination time-point was at least 4x the frequency compared to the pre-vaccination time-point, and the population of multimer-positive cells was classified as clustered and discrete by a jury consisting of five members. Jury members individually inspected each plot which was blinded for patient data and multimer specificity. Each multimer plot received a score of 0 (clearly negative), 1 (possibly positive) or 2 (clearly positive) by each jury member. Each staining could therefore receive a maximum of 2x5 = 10 points. A multimer staining was considered as clustered and discrete if its total score was at least 9. Vaccine-induced responses from 10 patients treated with and from 10 patients treated without low-dose cyclophosphamide are shown.

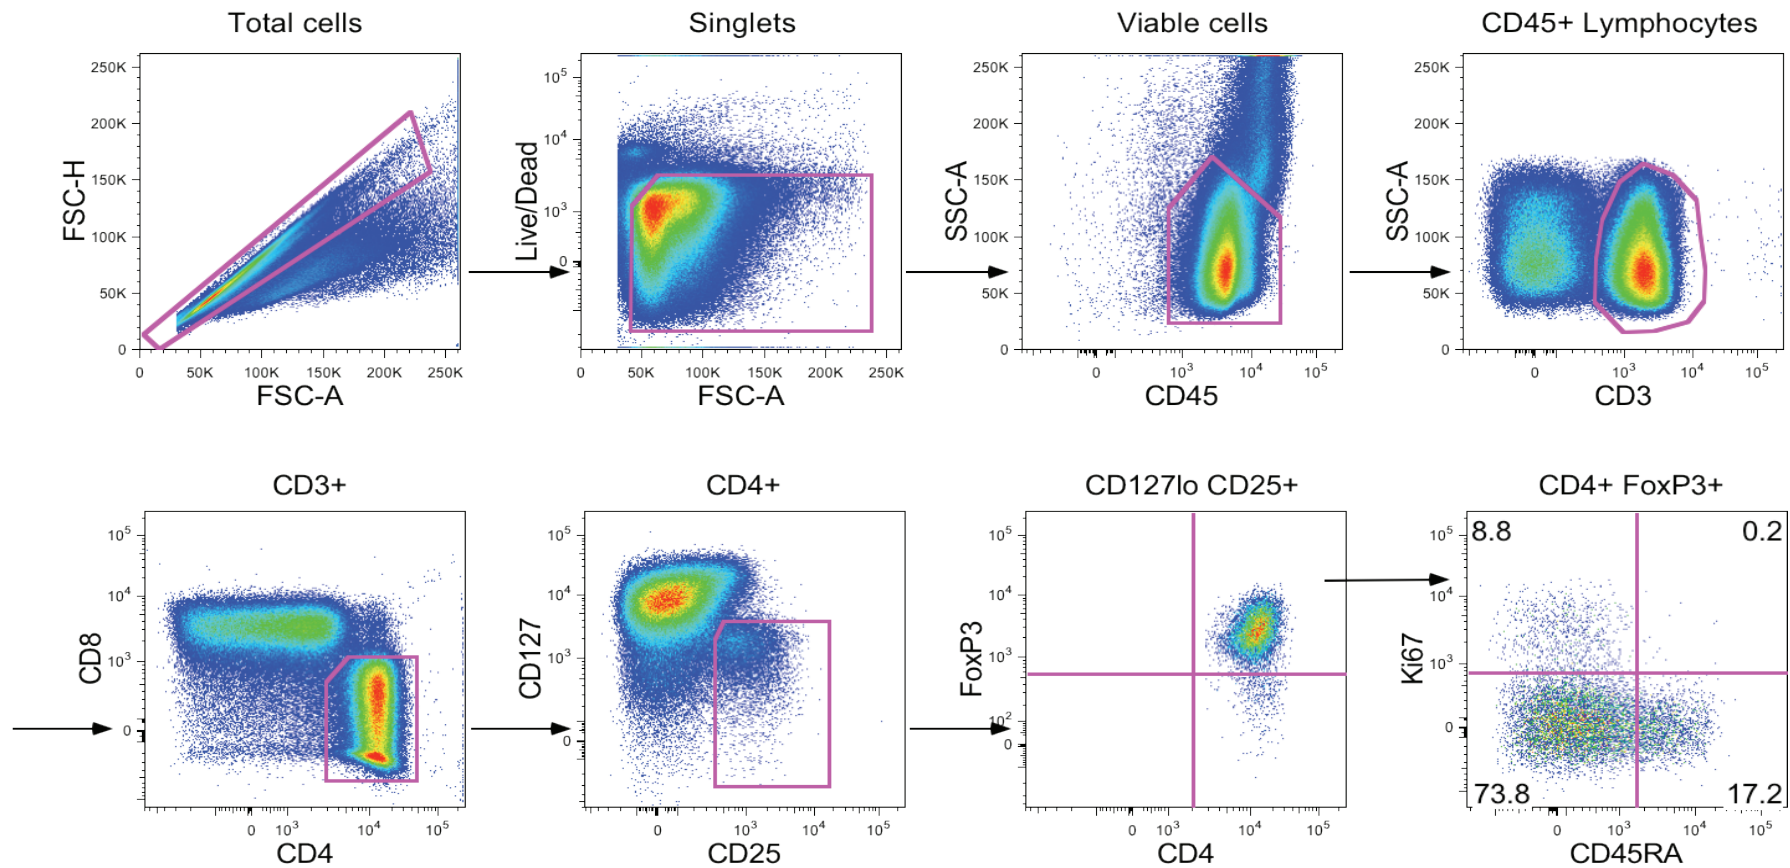

**Supplementary Figure 4**

**Representative flow cytometry plots showing the detailed gating strategy for quantification of regulatory T cells (Tregs).** Identical gates were used for analyses of all study samples. Samples were set as evaluable if at least 75,000 live CD45<sup>+</sup> lymphocytes were counted. To quantify Tregs, first total cells were identified by excluding debris using an FSC-A histogram. Singlets were selected as defined by having a similar height (FSC-H) and area (FSC-A) measurement in the forward scatter. Next, a gate was set to identify viable cells. Then CD45<sup>+</sup> lymphocytes and CD3<sup>+</sup> cells were selected. The CD4<sup>+</sup> CD8<sup>-</sup> subset among CD3<sup>+</sup> cells was identified and plotted for CD25 and CD127 expression. FoxP3<sup>+</sup> cells within CD127<sup>lo</sup> CD25<sup>+</sup> cells were identified as Tregs. Last, Tregs were characterized in terms of Ki67 and CD45RA expression which allows quantification of Treg subpopulations such as dividing vs. non-dividing (Ki67<sup>+</sup> vs. Ki67<sup>-</sup>).

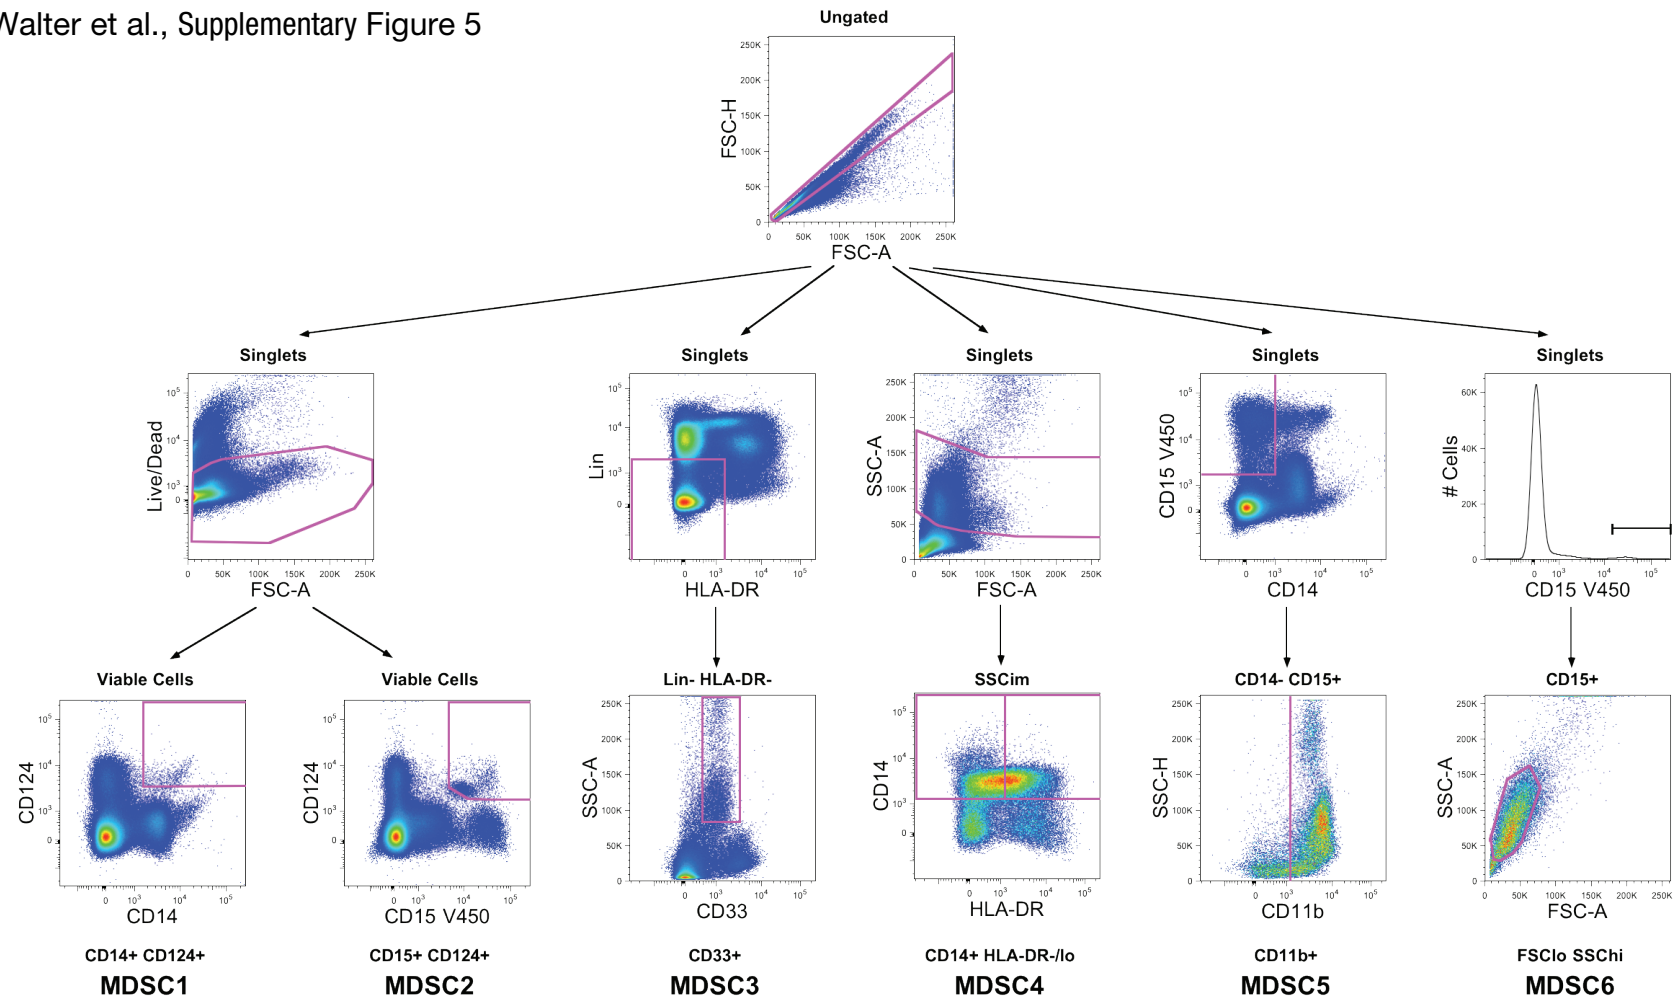

**Supplementary Figure 5**

**Representative flow cytometry plots showing the detailed gating strategy for quantification of myeloid-derived suppressor cells (MDSCs).** Identical gates were used for analyses of all study samples. Samples were set as evaluable if at least 75,000 live CD45<sup>+</sup> lymphocytes were counted. To quantify MDSCs, doublets corresponding to cell aggregates were excluded by the FSC-A/FSC-H profile and single cells were further analyzed. Progressive gating was next performed on singlet cells for all MDSC populations. For MDSC populations 1 and 2 a live/dead gating was included to avoid non-specific binding of anti-CD124 to dead cells.

MDSC1: gated on viable cells and identified as CD14<sup>+</sup> CD124<sup>+</sup>

MDSC2: gated on viable cells and identified as CD15<sup>+</sup> CD124<sup>+</sup>

MDSC3: gated on Lin<sup>-</sup> HLA-DR<sup>-</sup> CD33<sup>+</sup> (whereby Lin is CD3/14/19/56)

MDSC4: gated on CD14<sup>+</sup> HLA-DR<sup>-/lo</sup>

MDSC5: gated on CD14<sup>-</sup> CD15<sup>+</sup> CD11b<sup>+</sup>

MDSC6: gated CD15<sup>+</sup> FSC<sup>lo</sup> SSC<sup>hi</sup>



**Supplementary Table 1: Baseline characteristics and survival of IMA901-202 patients (PP).**

|                                           |                             | <b>All</b> | <b>+CY</b> | <b>-CY</b> |
|-------------------------------------------|-----------------------------|------------|------------|------------|
| <b>Sample size (n)</b>                    |                             | 64         | 31         | 33         |
| <b>Overall survival</b>                   | <b>Median months</b>        | 19.8       | 23.5       | 14.8       |
|                                           | <b>≥ 1 year</b>             | 67%        | 76%        | 59%        |
|                                           | <b>≥ 2 years</b>            | 41%        | 48%        | 34%        |
| <b>Age</b>                                | <b>Median years</b>         | 57         | 57         | 56         |
| <b>Sex</b>                                | <b>% Male</b>               | 78%        | 84%        | 73%        |
| <b>Karnofsky status ≥ 80</b>              |                             | 100%       | 100%       | 100%       |
| <b>Time since initial tumor diagnosis</b> | <b>Mean years</b>           | 3.4        | 2.4        | 4.3        |
|                                           | <b>Median years</b>         | 2.3        | 1.7        | 2.8        |
|                                           | <b>&lt; 1 year</b>          | 25%        | 29%        | 21%        |
| <b>Nephrectomy</b>                        |                             | 91%        | 84%        | 97%        |
| <b>Prior cytokine therapy</b>             |                             | 69%        | 68%        | 70%        |
| <b>Other prior anti-tumor therapies</b>   | <b>Chemotherapy</b>         | 27%        | 26%        | 27%        |
|                                           | <b>Hormones</b>             | 2%         | 0%         | 3%         |
|                                           | <b>Vaccines</b>             | 3%         | 3%         | 3%         |
|                                           | <b>Investigational</b>      | 2%         | 0%         | 3%         |
| <b>MSKCC prognostic score</b>             | <b>Favorable</b>            | 41%        | 39%        | 42%        |
|                                           | <b>Intermediate</b>         | 59%        | 61%        | 58%        |
| <b>Metastatic sites</b>                   | <b>Lung</b>                 | 83%        | 84%        | 82%        |
|                                           | <b>Regional lymph nodes</b> | 25%        | 23%        | 27%        |
|                                           | <b>Distant lymph nodes</b>  | 67%        | 71%        | 64%        |
|                                           | <b>Liver</b>                | 34%        | 36%        | 33%        |
| <b>No. of tumor lesions</b>               | <b>1</b>                    | 8%         | 10%        | 6%         |
|                                           | <b>2</b>                    | 9%         | 13%        | 6%         |
|                                           | <b>≥ 3</b>                  | 83%        | 77%        | 88%        |

**Supplementary Table 2: Baseline characteristics of patients stratified by immune responses (PP).**

|                                                        |              | Immune responders<br>(n=39) | Non-immune responders<br>(n=22) | Multi-TUMAP responders<br>(n=16) | Non-multi-TUMAP responders<br>(n=45) |
|--------------------------------------------------------|--------------|-----------------------------|---------------------------------|----------------------------------|--------------------------------------|
| <b>Age – years</b>                                     | mean         | 57.4                        | 58.6                            | 50.9                             | 60.3                                 |
|                                                        | median       | 56                          | 58                              | 52.5                             | 59                                   |
|                                                        | <i>P</i>     | 0.693                       |                                 | 0.008                            |                                      |
| <b>Gender – males</b>                                  | <i>n</i> (%) | 29 (74.4%)                  | 18 (81.8%)                      | 15 (93.8%)                       | 32 (71.1%)                           |
|                                                        | <i>P</i>     | 0.508                       |                                 | 0.095                            |                                      |
| <b>Karnofsky status – ≥80%</b>                         | <i>n</i> (%) | 39 (100%)                   | 22 (100%)                       | 16 (100%)                        | 45 (100%)                            |
| <b>MSKCC risk group</b>                                |              |                             |                                 |                                  |                                      |
| Favorable                                              | <i>n</i> (%) | 16 (41%)                    | 8 (36%)                         | 7 (44%)                          | 17 (38%)                             |
| Intermediate                                           | <i>n</i> (%) | 23 (59%)                    | 14 (64%)                        | 9 (56%)                          | 28 (62%)                             |
|                                                        | <i>P</i>     | 0.721                       |                                 | 0.675                            |                                      |
| <b>Time since initial tumor<br/>Diagnosis – years</b>  | mean         | 3.5                         | 2.7                             | 2.3                              | 3.5                                  |
|                                                        | median       | 1.9                         | 2.0                             | 1.5                              | 2.5                                  |
|                                                        | <i>P</i>     | 0.375                       |                                 | 0.208                            |                                      |
| <b>Time from prior therapy<br/>to Visit C – months</b> | mean         | 6.0                         | 4.4                             | 3.9                              | 5.9                                  |
|                                                        | median       | 2.0                         | 2.2                             | 2.2                              | 1.9                                  |
|                                                        | <i>P</i>     | 0.492                       |                                 | 0.417                            |                                      |
| <b>Nephrectomy – yes</b>                               | <i>n</i> (%) | 36 (92.3%)                  | 19 (86.4%)                      | 16 (100%)                        | 39 (86.7%)                           |
| <b>Prior therapy</b>                                   |              |                             |                                 |                                  |                                      |
| Cytokines                                              | <i>n</i> (%) | 29 (74.4%)                  | 13 (59.1%)                      | 11 (68.8%)                       | 31 (68.9%)                           |
|                                                        | <i>P</i>     | 0.220                       |                                 | 0.992                            |                                      |
| TKIs                                                   | <i>n</i> (%) | 13 (33.4%)                  | 10 (45.5%)                      | 7 (43.8%)                        | 16 (35.6%)                           |
|                                                        | <i>P</i>     | 0.350                       |                                 | 0.562                            |                                      |
| TKI: sorafenib                                         | <i>n</i> (%) | 7 (17.9%)                   | 1 (4.5%)                        | 2 (12.5%)                        | 6 (13.3%)                            |
| TKI: sunitinib <sup>a</sup>                            | <i>n</i> (%) | 7 (17.9%)                   | 9 (40.9%)                       | 5 (31.3%)                        | 11 (24.4%)                           |
|                                                        | <i>P</i>     | 0.056                       |                                 | 0.596                            |                                      |
| <b>Prior radiotherapy – yes</b>                        | <i>n</i> (%) | 6 (15.4%)                   | 4 (18.2%)                       | 1 (6.3%)                         | 9 (20%)                              |



|                                                                     |              | <b>Immune responders<br/>(n=39)</b> | <b>Non-immune responders<br/>(n=22)</b> | <b>Multi-TUMAP responders<br/>(n=16)</b> | <b>Non-multi-TUMAP responders<br/>(n=45)</b> |
|---------------------------------------------------------------------|--------------|-------------------------------------|-----------------------------------------|------------------------------------------|----------------------------------------------|
| <b>Other prior antitumor therapies</b>                              |              |                                     |                                         |                                          |                                              |
| Chemotherapy                                                        | <i>n</i> (%) | 10 (25.6%)                          | 6 (27.3%)                               | 4 (25%)                                  | 12 (26.7%)                                   |
| Monoclonal antibodies                                               | <i>n</i> (%) | 1 (2.6%)                            | 1 (4.5%)                                | 0 (0%)                                   | 2 (4.4%)                                     |
| Hormones                                                            | <i>n</i> (%) | 1 (2.6%)                            | 0 (0%)                                  | 0 (0%)                                   | 1 (2.2%)                                     |
| Vaccines (BCG)                                                      | <i>n</i> (%) | 0 (0%)                              | 2 (9.1%)                                | 0 (0%)                                   | 2 (4.4%)                                     |
| <b>Metastatic sites (radiologist)</b>                               |              |                                     |                                         |                                          |                                              |
| Liver                                                               | <i>n</i> (%) | 7 (17.9%)                           | 10 (45.5%)                              | 1 (6.3%)                                 | 16 (35.6%)                                   |
| Lung                                                                | <i>n</i> (%) | 28 (71.8%)                          | 14 (63.6%)                              | 13 (81.3%)                               | 29 (64.4%)                                   |
| Lymph nodes                                                         | <i>n</i> (%) | 30 (76.9%)                          | 15 (68.2%)                              | 14 (87.5%)                               | 31 (68.9%)                                   |
| <b>Total sum of target lesion diameters – mm</b>                    |              |                                     |                                         |                                          |                                              |
|                                                                     | mean         | 112.0                               | 138.2                                   | 101.8                                    | 128.8                                        |
|                                                                     | median       | 112.8                               | 89.8                                    | 102.0                                    | 102.0                                        |
|                                                                     | <i>P</i>     | 0.288                               |                                         | 0.332                                    |                                              |
| <b>Total number of lesions – <i>n</i></b>                           |              |                                     |                                         |                                          |                                              |
|                                                                     | mean         | 4.9                                 | 5.0                                     | 4.8                                      | 5.0                                          |
|                                                                     | median       | 5.0                                 | 4.5                                     | 5.5                                      | 5.0                                          |
|                                                                     | <i>P</i>     | 0.871                               |                                         | 0.810                                    |                                              |
| <b>No. of locations of tumor lesions (central radiologist)</b>      |              |                                     |                                         |                                          |                                              |
|                                                                     | 1            | 6 (15.4%)                           | 4 (18.2%)                               | 4 (25.0%)                                | 6 (13.3%)                                    |
|                                                                     | 2            | 15 (38.5%)                          | 6 (27.3%)                               | 5 (31.3%)                                | 16 (35.6%)                                   |
|                                                                     | >=3          | 18 (46.2%)                          | 12 (54.5%)                              | 7 (43.8%)                                | 23 (51.1%)                                   |
|                                                                     | <i>P</i>     | 0.777                               |                                         | 0.380                                    |                                              |
| <b>Baseline lymphocyte levels<sup>b</sup> – 10E9 l<sup>-1</sup></b> |              |                                     |                                         |                                          |                                              |
|                                                                     | mean         | 1.51                                | 1.50                                    | 1.51                                     | 1.50                                         |
|                                                                     | median       | 1.31                                | 1.34                                    | 1.30                                     | 1.31                                         |
|                                                                     | <i>P</i>     | 0.763                               |                                         | 0.942                                    |                                              |

Notes: <sup>a</sup> Patient 59-001 received both, sunitinib and sorafenib, as previous therapies.

<sup>b</sup> Values from VC for +CY patients and from V1 for –CY patients.

**Supplementary Table 3: Baseline characteristics and survival of IMA901-202 patients after prior cytokine therapy in comparison to historic controls.**

|                                           |                      | IMA901-202<br>Prior Cytokine<br>All | IMA901-202<br>Prior Cytokine<br>-CY | IMA901-202<br>Prior Cytokine<br>+CY  | TARGET<br>Placebo arm | TARGET<br>Sorafenib arm | RTKCC-0511-<br>014<br>Sunitinib |
|-------------------------------------------|----------------------|-------------------------------------|-------------------------------------|--------------------------------------|-----------------------|-------------------------|---------------------------------|
| <b>Sample size (n)</b>                    |                      | 40                                  | 20                                  | 20                                   | 452                   | 451                     | 63                              |
| <b>Overall survival</b>                   | <b>Median months</b> | 19.8                                | 15.8                                | not reached<br>(max. follow-up 33.1) | 15.2                  | 17.8                    | 16.4                            |
|                                           | ≥ 1 year             | 73.3%                               | 66.8%                               | 83.6%                                | ~59%                  | ~66%                    | ~61%                            |
|                                           | ≥ 2 years            | 45.9%                               | 38.2%                               | 54.5%                                | ~34%                  | ~36%                    | <42%                            |
| <b>Age</b>                                | <b>Median years</b>  | 57                                  | 59                                  | 56                                   | 59                    | 58                      | 60                              |
| <b>Sex</b>                                | <b>% male</b>        | 78%                                 | 65%                                 | 90%                                  | 75%                   | 70%                     | 68%                             |
| <b>Karnofsky status ≥ 80</b>              |                      | 100%                                | 100%                                | 100%                                 | 98%                   | 98%                     | 100%                            |
| <b>Time since initial tumor diagnosis</b> | <b>Mean years</b>    | 3.4                                 | 4.4                                 | 2.3                                  | 3.3 <sup>a</sup>      | 2.8 <sup>a</sup>        | 4.1                             |
|                                           | <b>Median years</b>  | 1.7                                 | 2.6                                 | 1.3                                  | 1.9 <sup>a</sup>      | 1.6 <sup>a</sup>        | 1.7                             |
| <b>Nephrectomy</b>                        |                      | 93%                                 | 95%                                 | 90%                                  | 94%                   | 93%                     | 92%                             |
| <b>Prior cytokine therapy</b>             |                      | 100%                                | 100%                                | 100%                                 | 81%                   | 83%                     | 100%                            |
| <b>Other prior anti-tumor therapies</b>   | <b>Chemotherapy</b>  | 35%                                 | 40%                                 | 30%                                  | 31% <sup>ab</sup>     | 27% <sup>ac</sup>       | NA                              |
|                                           | <b>Hormones</b>      | 3%                                  | 5%                                  | 0%                                   | 7% <sup>a</sup>       | 7% <sup>a</sup>         | NA                              |
| <b>MSKCC prognostic score</b>             | <b>Favourable</b>    | 45%                                 | 45%                                 | 45%                                  | 50%                   | 52%                     | 54%                             |
|                                           | <b>Intermediate</b>  | 55%                                 | 55%                                 | 55%                                  | 49%                   | 48%                     | NA                              |
| <b>Metastatic sites</b>                   | <b>Lung</b>          | 90%                                 | 90%                                 | 90%                                  | 77%                   | 77%                     | 81%                             |
|                                           | <b>Liver</b>         | 28%                                 | 20%                                 | 35%                                  | 26%                   | 26%                     | 16%                             |
| <b>No. of tumor lesions</b>               | <b>1</b>             | 5%                                  | 10%                                 | 0%                                   | 14%                   | 14%                     | 18%                             |
|                                           | <b>2</b>             | 8%                                  | 5%                                  | 10%                                  | 29%                   | 29%                     | 24%                             |
|                                           | <b>≥ 3</b>           | 88%                                 | 85%                                 | 90%                                  | 57%                   | 57%                     | 59%                             |

<sup>a</sup> Based on the Nexavar® EPAR with n=384 in the sorafenib and n=385 in the placebo arm

<sup>b</sup> Pyrimidine analogues 18.7%, Vinca alkaloids 12.7%

<sup>c</sup> Pyrimidine analogues 15.6%, Vinca alkaloids 11.5%

Shown are IMA901-202 patients of the per-protocol group that were first line treated with cytokines. Historic control parameters were derived from the Nexavar® EPAR (EMA/H/C/000690 -IA/00029/G

[http://www.ema.europa.eu/docs/en\\_GB/document\\_library/EPAR - Product Information/human/000690/WC500027704.pdf](http://www.ema.europa.eu/docs/en_GB/document_library/EPAR_-_Product_Information/human/000690/WC500027704.pdf),

September 2011), Sutent® EPAR (EMA/H/C/000687 -II/0028 [http://www.ema.europa.eu/docs/en\\_GB/document\\_library/EPAR - Product Information/human/000687/WC500057737.pdf](http://www.ema.europa.eu/docs/en_GB/document_library/EPAR_-_Product_Information/human/000687/WC500057737.pdf), September 2011) and references 1-3.

Reference List

1. Motzer, R.J. *et al.* Activity of SU11248, a multitargeted inhibitor of vascular endothelial growth factor receptor and platelet-derived growth factor receptor, in patients with metastatic renal cell carcinoma. *J Clin Oncol*. **24**, 16-24 (2006).
2. Escudier, B. *et al.* Sorafenib in advanced clear-cell renal-cell carcinoma. *N. Engl. J Med* **356**, 125-134 (2007).
3. Escudier, B. *et al.* Sorafenib for treatment of renal cell carcinoma: Final efficacy and safety results of the phase III treatment approaches in renal cancer global evaluation trial. *J Clin Oncol* **27**, 3312-3318 (2009).
